# Supplementary material for: A highly electrically conductive graphene–silver nanowire hybrid nanomaterial for transparent conductive films
Source: Royal Society of Chemistry journal article supplement (doi:10.1039/c4tc01217h), 2014-06-27
Supplement: c4tc01217h1.pdf [file c4tc01217h1.pdf]

Electronic Supplementary Information for

## **Highly electrical conductive graphene-silver nanowire hybrid nanomaterial as transparent conductive films**

Sheng-Tsung Hsiao<sup>a</sup>, Hsi-Wen Tien<sup>a</sup>, Wei-Hao Liao<sup>a</sup>, Yu-Sheng Wang<sup>a</sup>, Shin-Ming Li<sup>a</sup>,  
Chen-Chi M Ma<sup>\*a</sup>, Yi-Hsuan Yu<sup>b</sup>, and Wen-Pin Chuang<sup>c</sup>

*<sup>a</sup>Department of Chemical Engineerin, National Tsing-Hua University, Hsin-Chu 30013, Taiwan, ROC.*

*<sup>b</sup>Chemical Systems Research Division, Chung Shan Institute of Science and Technology, Tao Yuan  
32546, Taiwan, ROC*

*<sup>c</sup>Division of Applied Chemistry, Material and Chemical Research Laboratories, Industrial Technology  
Research Institute, Hsinchu, Taiwan*

### **Contents:**

**Fig. S1** The Raman spectra of GO and GN.

**Fig. S2** The high resolution spectra of (a) Ag<sub>3d</sub> and (b) S<sub>2p</sub> XPS core level spectra of  
pure AgNW.

**Fig. S3** Surface resistance versus transmittances of GN/AgNW TCFs.

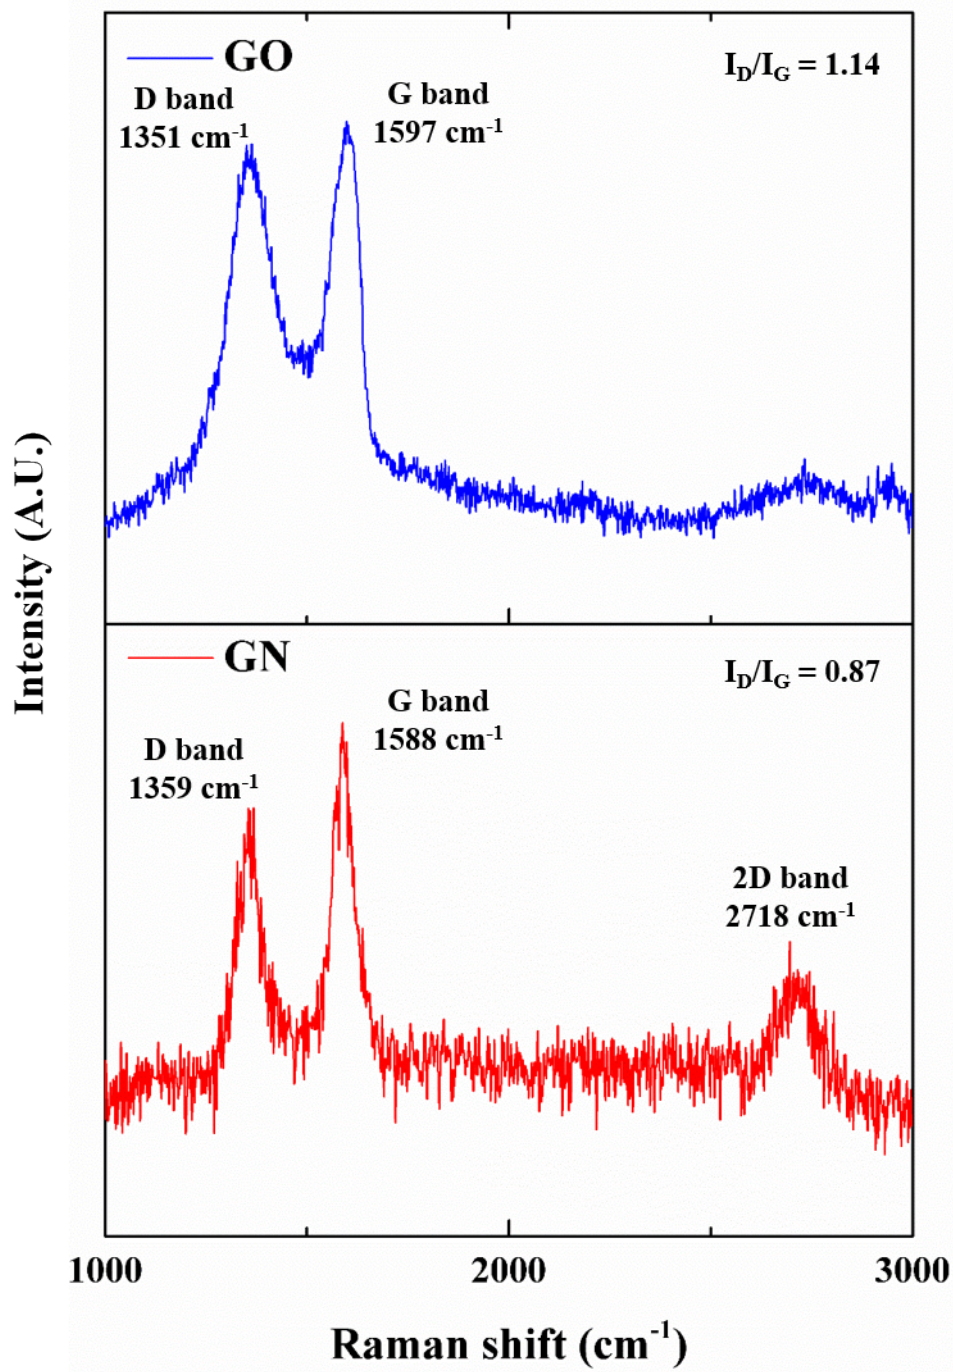

Fig. S1 The Raman spectra of GO and GN.

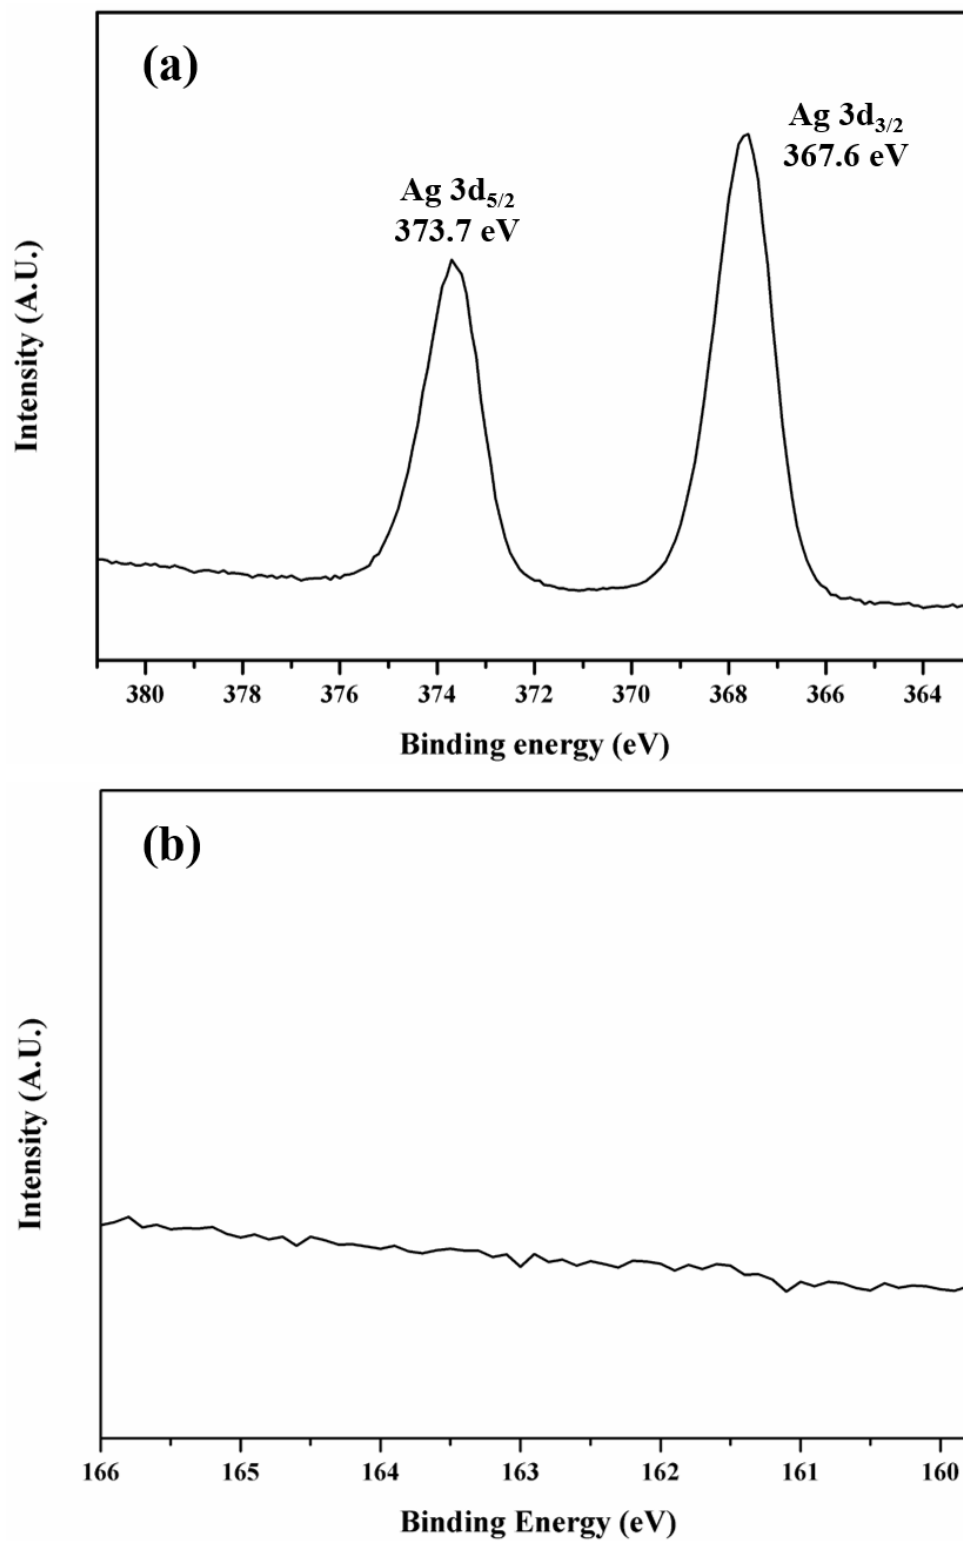

**Fig. S2** The high resolution spectra of (a) Ag<sub>3d</sub> and (b) S<sub>2p</sub> XPS core level spectra of pure AgNW.

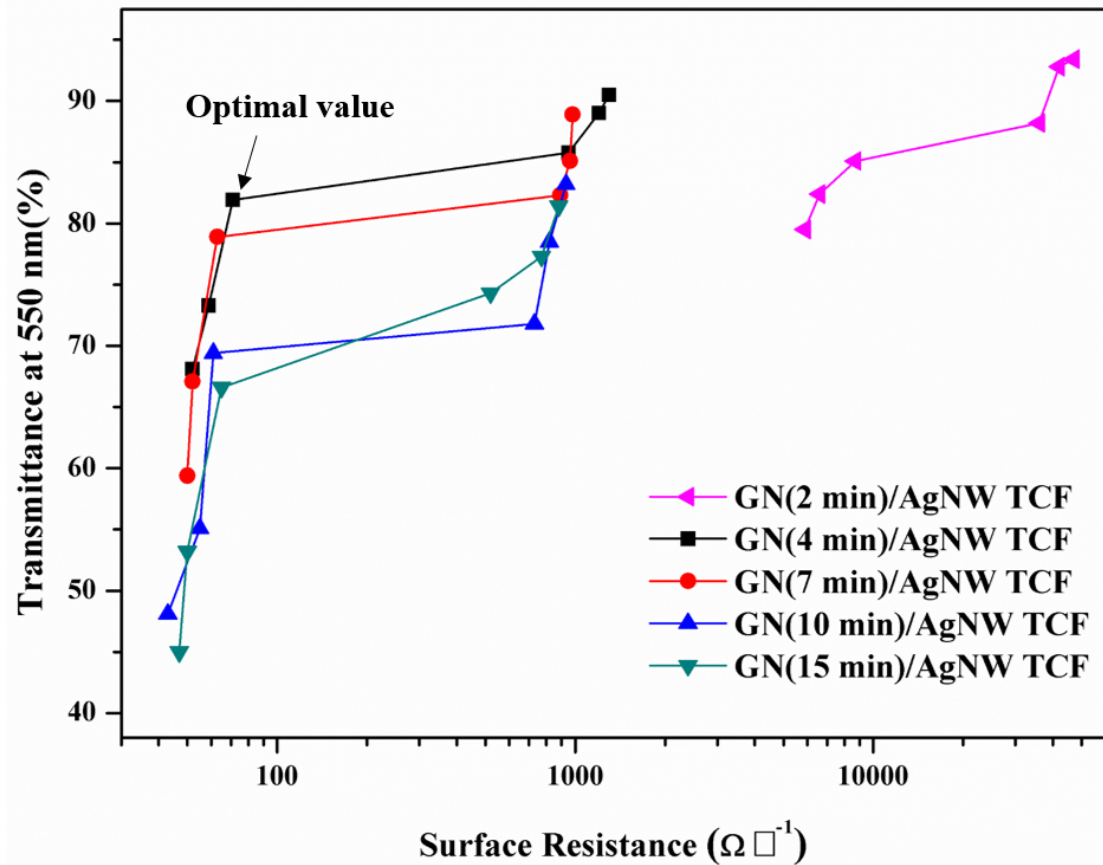

**Fig3.** Surface resistance versus transmittances of GN/AgNW TCFs, and the 71  $\Omega \square^{-1}$  of surface electrical resistance with 85% light transmittance was the optimal value for preparing high performance TCF (GN (4 min)/AgNW (30 min)).
